# Supplementary material
Source: publisher site journal article supplement (https://www.dovepress.com/article/416196)
Supplement: Supplementary file 1 [file get_supplementary_file.php]

**Appendix. The 22-item CFA Model**

Factor 1: Allegorical Meaning

1. I can understand the social, cultural, and political implications in an image.
2. I can place images in their cultural, social, and historical context and interpret them in depth.
3. I can infer the deep meaning implied by the image creator from the details of the image.
4. I can recognize the discourse position, creative techniques, and characteristics of image creators.
5. Through the images as historical texts, I can understand the multiple political, social, and cultural implications behind them.
6. I can gain insight into the intention of the image creator from the details of the image.
7. I can identify the deep cultural meaning laid out by the image creator.
8. I can make a systematic interpretation of the cultural or historical representations of pictorial works, and summarize the humanistic ideas or epochal meanings they want to express.
9. I am able to recognize the significance of images in their historical context. For example: the historical background and importance of the crusades.
10. I can recognize the constructed meaning of the image and the ideological content behind it.
11. I can examine contextual context within or between images and draw appropriate inferences from their clues.
12. I can identify the moral, legal, or ethical issues that the image creator intends to imply through the image.

Factor 2: Explicit Meaning

1. I can describe the expressions, postures, dresses, etc. of the characters in the image.
2. I can describe the basic design elements to be presented in the image (e.g. composition, contrast, repetition, style, etc.).
3. I can describe the subject, title, data, etc. to be presented in the image.
4. I can describe the basic visual elements of an image (e.g. color, typography, lines, shapes, etc.).

Factor 3: Symbolic Meaning

1. I can infer the information implied in the story through my own knowledge or experience, such as the possible traits, psychology, emotion and state of the characters, or the tone or atmosphere in the story.
2. I can use the context shown in the image to interpret the visual message it wants to express.
3. I can summarize the message or theme that the image is trying to convey.
4. When I see an image, I can understand the meaning of the symbols or graphics used as visual effects.
5. I can interpret and analyze the meaning of charts or graphs.
6. I can find the purpose and meaning of an image in the context of a pattern or a set of patterns.
